# Supplementary material
Source: publisher figshare collection journal article supplement (https://frontiersin.figshare.com/ndownloader/files/31025017)
Supplement: Supplementary file 1 [file 31025017]

**DATA S4|** The full nucleotide corresponding sequences of *Hi-IAG*, *Hi-Vg*, *Hi-UCF* and *Hi-UCM* in *P. playceros*.

>Hi-IAG in Pandalus platyceros
TTCATGAAATAATGCTTTAATAATATAGTTACAAAAGGCATTTGAAAGATTTTCCCCGATACGAAGCAGG
GAATCAACGTCTTAATAACATTGAAAGAAATTGTCATCTGTTACAGGTTTTGCAAGTGACGTATACGAGT
CAGTCCAGCTCTGTGATTTATCCTATTTGGCGTAGTCGAAGTTACCGTCGGCAACCGGCATTGCAAATAA
GACCAATAAGAGAGCCACATTGACTGGGTTGCATTTTCTTTTTACCTTTCGATGACGTCATTTGCAAAGT
ATTCATTAGGAGGAAGTCTATGTTTAATCAAGCAAACTATTTCCGAATAAAAATAAGACTATCTATGAAA
AGTTATACTGCTGAATATCAATATTGGAGTCTTTATTGTCATAAGTAATCTAATATGAAATAGTTGCTTT
TGTATATTTCTCCATGTGAGAGACAAATTCTGAATTATTATTTTGTAGCATTTTTTAGTACATCACAATA
TTTAAAATAATTAACGTTTAAATATATTTTTCTTTTAATCTAGTAGAACATCAGAGATAAACAAATTTGT
ATGTATAGATATGGGGATTTTAGTCAATTTAATTTTCAAACAAGTTAATTTTAGAGTAGTAACTAGTAAT
CTATGTATATACCCTTCTAATTCATAGTGAACTAACCTTTTATGAAATTCATAATTTAATGTGAGTTATC
ATTAAAGGGGCAGACATTTAACATCAAAATTCAAAATGTGAAATAAAAATGGCTATTCATGTGAACATTG
GTTCTAGGGACACCCAAAATGCGTTCATAAACTTTAGGCCAATTTTAATTTAGAAATAACTACCATGTAA
GAGATGTTTGCTTCATCGGGCAAGAAGTAACAAGAGAAATGCGAAATTTGAAAGATAAAGAATCTATCAT
AGAACATATATTGAGATGCTGTCTAATATTTTTGTTCACATTCTTCCTATCTCTTCATAGTGAATGTACT
GATGTTTACTATCAGCCTGAATTCGTACAGTTGTTGACACCATCAAGCAGAGTGAGACAATACTCAGCTA
CTTCATCAAAGACACAACGTCTGAAATTAGTGAAGCTGCAGCACTTCTCTCTTGGATTCTTCCGTACAAG
CTCTCTCCGGAACCGAGGATTCGACTGTAGCATCATGTTGGCCTCCTCAGAGCTCAGAATTATTCCCTTC
ATCTCCATCTTGAAGACATTCTGTTGCTGATCCAAAGGAAGATCTGATAATCCTGGTGTGGGCGTCTCAA
CTGAAGGGGTAGGACTGGGATCCACTGAGCGTCGGTTTCTTGGCACGTAGGTTGGTCCTGGGCTGATGTA
ATTATTGTATGTTTTACAGATCGATCCCAGGGTGTTACCGATGTCCCCACAGTTGAAGTCGACCGTGAGA
CATTCGATAGAGTATGCAAAAGACGACTTCAGGAGAGATGATAGCAGCAGGACTCCAAAGACAACAATCA
TCTTTTGAAGATATCCTCATCCCATCGTGGAAGTTGTCGAAGTAGTAACTTTAAGCACAACTGAATTAAA
CTATAGATTAGTTAATTAAGTGTTCTTGTATCCTCGATAGGAGAGGAGAATATTTATTGAATAAGAACAA
ATGTGTTTGAAGAATAAAGAAGTAAAGCAAAGCGTCTTTGAAGAGACACTGGTTAGTCAGAGGCACAGAA
AAAGAGCTTCTGCAAGTCGTGTCAATGACGGCG

>Hi-Vg in Pandalus platyceros TTGGAATCTGGCACTGCTGATCTTCCCGCCAGGACTTCACCAGTTCCTGTAAGGTAGATGCCCTTGAGCC
ACTAGGAGTCATCCAGTCATTGCCCATCTCACCGTCATAGGTTCCCAGAAGTCCAGCTAATTGGCCAAAT
GTCCAACCAGACACTTCGACAGATGCTGTATGGCTCTTCTTGTAAACACGGAGTGTGATAGTGGGTGTCA
TTACTTCGATCTTCTCGGCCATCTTGTAGACCTTAACTTCCCCTTGAATTTGTCGAGGACCACTGATGGG
TTGGCCATTCATGGTAACAGTGAAATCGGGTTTCACTTCCACTGTAATTCCAGATACTTTCAAGATGAAA
TGTGATGAAGCAGCAGCAGCTTGCTGACTCTGCATTACTAAGGAATCTGACTTATACTGTGCTAGGAGAA
GCTTACATGATGAATGAGGAGCTCGTAGAACGGCTCCATCAAAGGTAATGATCTCTGTGCCATCAACTAC
CATTGCAGTGCGGTTGTATGGTGGCAGCAGGTATCTAGCATGACGAGGCATAAATGAGTAGTAGGCCCAG
ATTAAGTTGTCTACGGGAGTAGGCAAAAGGGCTTCAAATGACCAAAGAGAGGTGTCGATAGATGACATTG
GGCTCAAGGAGACATAAGATGCTGCTTGGGTCAGTGAATATACCTGTCTGCGAATAGGTAATTGAAGTTG
CATGTGGTTGCCTTCCATTTGCACATGCAAGAAGAATGCATTTTGCAGAATATTCTTTACCACATTGTCC
ATGCTCTTAAACATAATTCGGTCAAGATTCAAATGTTTGATCATCCAATTAACGACTGCTCGAGGTTTAC
TGTGGAGCATGAGGTTGTGCCGTTGTTTTGCCAAATCCTTTGCTAGAGTAGCTTTAACCTTCTCCAAAAT
CTGTTTCATGCTTTGGTACTCTTCTGGGTACTTAGATAAAGCAACATCAAGTTCTTCCAAAGCCGTTCTG
TAAACTGCAGTGTTCTGAATCTTATGCCACACATTTTGCAGTCCTTCTGACATTTCACCACTCTTTACAC
TTTGGAGTGTTCCCATAACAGCTTCAGTGATGATTTGATTGATATAATCAAATTCAGTTTGCAGCATCCT
CACTGAGTTTGATACTGATGAAGCCATCATGTGTTGGATCTGGACGTACTGAGACCATAGCTTGACACAT
CCATTTGCAATATCACGGACAATATCACTGCGTGCACATCTCTTGATCACTTCAATGCTCGGAATGACAC
CATCATACCTCAAATCTTCATAGATCCTTGAAGCTTCAGCCTTAATTTCTTGCCAGAACATTGCCATCTT
GGAAGAAGGAGAACTAGCACTTCCTTCTGAAAGTACTTCACGGCACATGTTGTCCAACCAGGAACCAGCT
GAGGAGGTGGTTTCTCTCCAGTTTTCAGACATTGCATTCATGATGGTGCGTAGATGATCACCGTCATACT
TGGTTTCAAGCTTCATAAGTGAAGGAGATGTAAGCATTACACGGACCATACCTTGGATTCTTCTCTCATG
AGTTGCAGGGTCAACTTCTGACATGCTGACTTCTACGTTCTTCATACCTTGCACTCCGACCCTTGTGACA
TAGAATCTGTTACTACCTTGTTTCTTTATGACAACCTCAATAAATATTGGCTTGCACAATTCGGCAGAAA
GATCATATGTTCCAGTTACAGATGAATGACCCTTGGCTTCAACTTTCATTCCATAACAGTCAGGAGTCAT
GTAAGGTCTGAGTGATCCAGATATATCCATGACTGTCCGTCCTTCAGTCTTTACAGTGAAGGATGAAGCA
GCAAGTCTGTCAAAACGAATATCACACTTTCCTGACATCAGGAAGGATACCGGTGCAGATGGAGTCTTTT
GGAACTTGACATCAAACCCGATAGTATGAGGACTATAAGCAGCTGCGAAATGTACTTTAGGGTTGACTTT
CAGCGCCTTTCCAGATAATTGAGCTTCTACAATGACAGTATTTTGGGCGAAAATCAGAGACTCCAGTTTC
CCAGTAATCTTATCTTCAGGGTTAGGGAAGATATCTAATTCAACGGAACCAGTGATCTTTTGTCCATTAT
TTCCGTATTGCACATCTATTTGTAGATCCCTAACCAAGTTTGGATGACTTATATGTCCATTAAACCTTGA
TTGTTGATTCCAGTCGTGAGCATGTCTGGCATAGAGCTCATACTTAGATGCACTAACACCCTTGTGAGGA
TGGAACTTCATGCTGTATTCTGAGTCTGAATATTTAACTTCCGCTTCCATTGTTCGAGAAGGAGATTTCA
TTAAGATTGAGTGGGAATTTGGTGTTGTTTTATGATAATGGAAGAGGTAGATAGCTTGAACTTCCTGAGC
TCTACCACTCATGGGTCTCATGGAGCCAAGCCTTTCGATAGCCTTTAAAAGCTCAGAAACCTCTTTTAGG
TTCAGTTCAACTTTGAAGGACTGAACACCACCCTCTGGAGACAACTTTAACTCGTACAGAGCGCCATCAA
CTGGAGAGCCCATTTCAATTTCCCATTTAGCACTATACTGGCCCTGTTGATTAGACAGTATGAATCTGGT
CTTCATAGGCTGCTGAAGTGATGGGCTGGTGATATGAGCCTGCACATAAGCTTCACGTTGGCTGGCGGTC
CCTCTGTGCATTGTTTCAATGATTACTTTCATTTGATGCCCTTGAGGAGAAGTGATGTCTGCTTTAGTAA
TGAGCTTCATGTTGTATTCTCCTCCAAGCCATTCAACAGAAGTTTCAGAGTTCAATTTGTATTCGCGATT
TTCAGGAGTTTTGAACGTAACCATTACATCTACTTTGGGGCTAGAGGATTCTCGTTCAATCACCAGGACT
GTCTCCATTTTGTAAGTTCTATGAGATGGTGTGGTGAAATCTAATTTAACGCTGTTTCTTCCATTAAACC
AATTGCGGGGATCGGCTAAGCTTAGTTCAGTCTTAAACTGACAAGTATGATCCAGGTAGGTCCATTCACC
CTGGATGACTGAGTTTTGTAGAGTGGAAGTACCGCTGATGATGGAAACCTCAGTCTTGAACTTCTTATTC
GGGTTACGATCAACGTCCCATGCAAATTCAATTGTTGCCTTCTTTCTTTCAAAATCCATATCAAAGAAGC
CCTTCCATCTTAGGGGGGATGAGCTCTTTGGCATCAAAAGCTGATTGATACTCATGTGAACGACCTTTTC
GCTGATGATGACATCGATTTTATTTTCAATCATGGAGGGTATGGTCAGTTTGATGTTCATTTTTGTTTGC
TGTTCGTCTTGAGATGCCATATTCCATTCGACGGCTATCATACGCTCTGAATGGTTTACCAATTCAAAAG
CTACTGCCTTCTTGCCTTGGGCAGATACAACAGATGTTGAAACAGTGAATGGTTGACTACGCATACAAAC
AATTTTTAACTGTGTCTGAAGCTCAGTCATTCTTGATGAAATCCTAGCAGTAACTGGTCCTTCAACCTGG
AAAATAACACTCTCTCCATGATGGGCACGAGCCTCAATCTGATACTGAGAGTTTCCTTGGTGAGCTGCAG
ATGCTTCAAACTTCATTGGCTTGATGCATGCAGGAATATCAACCAAGAAGTTCATCTTGTAGGTCTCCCC
AGAACGGGCAAAGATCATTTCTAGATCCGTAAGTTTCATGCCTCCTTCGCGAGTTACTCTTAATGTTGCT
CCTCTTTTCGCATCATTATTGTATATGACAATATTTGTTTCATATGGAACATGTGCAATTTTTCCTTTTA
AGTCCGTTTTTAGAGTCATATCCCGATATGAGCTTCCTTCAATCATATGGGTGGCCTGAACTACAGCCCA
CTCTGCATCCATTGGACCAAGTTTGAATGCTGAACTGTACTGCGAATCACTTGCCTTTCGGATAAAGGAA
ATGAGGTGCCACCTTCCAGATGCAATTGTACATTCAAATTTACGCAACCTCTTTGGCATTGGAATCCTGG
TCATTTGACTATAAGCCAAGTCTCCACTGGCTTCAAAGTTGATATCAATAGTTCTCTTGATTGTGGCCAA
GGTTCGGAAAACAGTATCCACTTTGACTTCCTGACCATCATCTGCCATTATGAATTTTGCTTCAAATGCT
TTTGTGTCTGGTGTGTATTGCCTGCTTCGACTGGCATAAGCATCGAGTTTCAGTTGTTTTTCAGATTGTG
TCCATTTGTTGTTGATTTCTACTTTGATGCCACCTGTCGTCTGGGATTCAAGTAAGCATGTGAGTTTGGC
CATGTCTCCTTGGTTAGAGTAAGAAACCATGACATTGGCTTTTCTTGGTGTGGAGGATCCTTGGGCTTCG
GTTTCAACCTTGATTTCTTTCTTTCCTTCAGTATTTTCAATGTTAGCCTTCATACGGTAGCCTCTCATGC
TGGGATCTGATTTTTCTAGGATGACCTTGGCAATGGCAGGTGGTCCAAGAGGAAGGCCTTCGCTGCGGAG
AACATTAGGCATGTTGATATCGAAGCAGAGCTTAAGACCAAGCATTGGCTCTAATGCCATCATACAAGAT
CGTGTCTGGAACCTTGTACTTCTTACTGATGAAGGATTGATTTTGGTCTCAGGTTGTCCTTGTACTTCCT
TCACTAGATAAGTTTCGC

>Hi-UCF in Pandalus platyceros
ATACTATCCTCAACAGTGTGCCAATAACCTTAACAGGTTTCACCATAGTTACTGCTACAGTCACCACTTA
TGGGGCACACCAGACTGAAGTAGATGACGTTGTAGCAATAAGCACGACAATTGTCAACCGCCCAACGACC
GAGTTTGTCACTACTGCGAAGAGTAACTTTGTATACGAGACTAGAGTATCTGTAGAAACCTACACTATTA
CCCACAGTGCTTACTTGATACACCAAACCACCTTCACCAGTATTGTTTCTCAAACATTAACTGTGTCCTC
G

>Hi-UCM in Pandalus platyceros
GAAAATGATTTTCTTTTCCTTAGTCGACAGATCAATTCATTTGGAATCAAAGTGACCTTATAAAAATACA
AATAAATATATGAAAATACTCATTTTTTGGTTGATTTGATGTTTCCGTTCAAAAGCGAGTCCAGGCGGCC
TTAAGCCGACAGTGTTGTTGTGCAGACATTCAACATGCATTTGTAGAATGCCAAAGCCTCCTCATTGATG
TTTTTCTGTGCAGAACATTGCGTCACTTTGTTGGTGATGTTGATGACGTGGGCATCAGTGACCTCACTGG
GTTTGTTGGTGTTGATGACTTCTGTGATGTATGACGTCATCGATGTCACGTTGATGTCTCCGTTTTCTTC
GACCAGGCCGTGGTCTTTTGATACCTGAACCAAAGCACAGTTTTTCACATTATCAGGTTGGGTCCAAAAA
TCACCTGGTAATACCAAGCAGTTGATACCTGCTTTATCCACACAGTTTTGCGTGATTTTTATAAAGGCCG
CTTTATCCTTAACACCGATAAACTCGCGGCATGTGCAATCGTGATCACCACTTGCACAAGGTTGCTCTTC
CCTCGCTCCTGTTCTCCTCGGATTGGCTGATGCCAGGGCGGCAGCCAAGAGAACGACAGTTATCACGATT
TTCATCATTTTGTCTTTGCAGAGTTGTCGTCTTGATTCAGTGTAG
